1 **Impaired M-current in KCNQ2 Encephalopathy Evokes Dyshomeostatic Modulation of**  
2 **Excitability**

3

4

5 Dina Simkin<sup>1,2</sup>, Timothy J. Searl<sup>2</sup>, Brandon N. Piyevsky<sup>1</sup>, Marc Forrest<sup>3,4</sup>, Luis A. Williams<sup>5</sup>,  
6 Vaibhav Joshi<sup>5</sup>, Hongkang Zhang<sup>5</sup>, Steven J. Ryan<sup>5</sup>, Michael Schwake<sup>1</sup>, Gabriella L.  
7 Robertson<sup>1</sup>, Peter Penzes<sup>3,4</sup>, Linda C. Laux<sup>6</sup>, Owen B. McManus<sup>5</sup>, Graham T. Dempsey<sup>5</sup>, John  
8 J. Millichap<sup>6</sup>, Alfred. L. George, Jr.<sup>2,\*</sup> and Evangelos Kiskinis<sup>1,3,\*</sup>

9

10

11

12 <sup>1</sup>The Ken & Ruth Davee Department of Neurology, Feinberg School of Medicine, Northwestern  
13 University, Chicago, IL, USA

14 <sup>2</sup>Department of Pharmacology, Feinberg School of Medicine, Northwestern University, Chicago,  
15 IL, USA

16 <sup>3</sup>Department of Physiology, Feinberg School of Medicine, Northwestern University, Chicago, IL,  
17 USA

18 <sup>4</sup>Center for Autism and Neurodevelopment, Feinberg School of Medicine, Northwestern  
19 University, Chicago, IL, USA

20 <sup>5</sup>Q-State Biosciences, Cambridge, MA, USA

21 <sup>6</sup>Epilepsy Center and Division of Neurology, Departments of Pediatrics and Neurology, Ann &  
22 Robert H. Lurie Children's Hospital of Chicago, Feinberg School of Medicine, Northwestern  
23 University, Chicago, IL, USA

24

25

26 \*Correspondence: [al.george@northwestern.edu](mailto:al.george@northwestern.edu) and [evangelos.kiskinis@northwestern.edu](mailto:evangelos.kiskinis@northwestern.edu)

27

28

29

30

31 **“The authors have withdrawn their manuscript whilst they perform additional**  
32 **experiments to test some of their conclusions further. Therefore, the authors do not**  
33 **wish this work to be cited as reference for the project. If you have any questions, please**  
34 **contact the corresponding authors.”**
